# Supplementary material
Source: Springer Nature journal article supplement (https://www.springermedizin.de/resource/supplementary/12957_2012_1594_MOESM4_ESM.pdf/9563932)

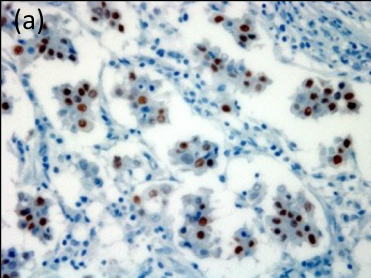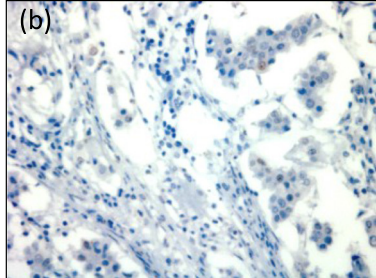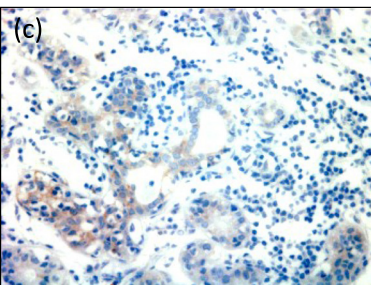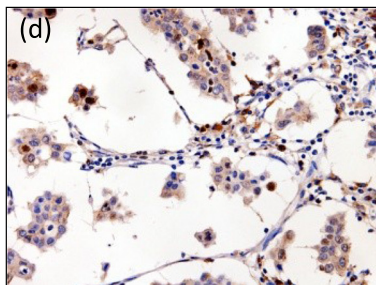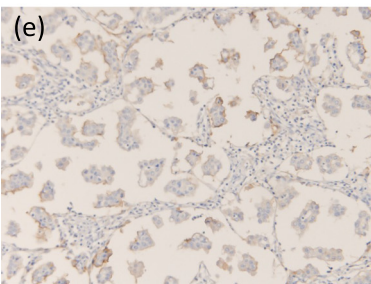

Supplement: MOESM4 [file 9563932]
